# 1 *Methods in Description and Validation of* 2 *Local Metagenetic Microbial* 3 *Communities*

## 4 *Authors:*

5 David Molik, Integrated Biomedical Sciences, University of Notre Dame, [dmolik@nd.edu](mailto:dmolik@nd.edu)

6 Michael Pfrender, Biology, University of Notre Dame, [mpfrende@nd.edu](mailto:mpfrende@nd.edu)

7 Scott Emrich, Computer Science and Engineering, University of Notre Dame, [semrich@nd.edu](mailto:semrich@nd.edu)

## 8 *Abstract:*

9

- 10 1. We propose minhash (as implemented by MASH) and NMF as alternative methods to estimate similarity  
11 between metagenetic samples. We further describe these results with cluster analysis and correlations  
12 with independent ecological metadata.
- 13 2. Species and kmer abundance information is used to determine similarities and create clusters to better  
14 understand how communities interact, as well as relate to known environmental variables, such as Ph and  
15 Soil Conductivity.
- 16 3. We use cluster silhouettes to assess various approaches for clustering metagenetic samples as well as  
17 anova to uncover links between metagenetic samples and the known environmental variables.
- 18 4. By analyzing data from the Atacama desert and determining the relationship between ecological factors  
19 and group membership, we show the applicability of these methods.

## 20 *Introduction*

21       How microbiome communities, and in a broader context local communities, are determined, described, and  
22 validated is a matter of some debate (Holyoak et al. 2005). While Principal Components Analysis (PCA) is the  
23 most common computational approach with the most divisive components considered the most ecologically  
24 relevant, PCA is biased towards components that have the most variance (Parsons et al. 2009), and is not  
25 necessarily useful for factor analysis, or determining underlying variables where many observed variables may  
26 reflect a few unobserved variables (Jolliffe 1986). A common description of community structure beyond the  
27 initial group assignment is also often lacking in PCA. Here we present two alternative computational methods to  
28 determine the grouping of metagenetic samples: k-mer minhash sketching and Non-Negative Matrix Factorization  
29 (NMF). NMF can be paired with k-means to estimate the number of groups present and has the benefit of  
30 determining the most important feature driving inferred relationships. Minhash sketches can be used to quickly  
31 estimate similarities between whole samples in an alignment-free approach, i.e., OTUs do not need to be  
32 generated first. While minhash and NMF are used here to cluster metagenetic samples based on inferred  
33 relationships, note that NMF focuses on what is distinct (in a cluster) while a minhash implementation (Ondov et  
34 al. 2016) is combined with hierarchical methods to infer clusters based on pairwise similarities. For this reason we  
35 use Silhouette plots for cluster assessment, which is a measure of how close each point in a cluster is to other  
36 clusters. Finally, we use ANOVA to determine the relationships of known environmental factors to the inferred  
37 clusters using our new and existing approaches.

38       One local community can be delineated from another by inferred differences in the species detected within  
39 one or more samples (Rusch et al. 2007);(Seshadri et al. 2007). K-mer estimation methods such as MASH or  
40 OTU methods such as PCA or NMF should be able to distinguish local communities based on the inference of  
41 species. Using these methods, however, does not necessarily provide distinctions between environments or even  
42 interrelated communities. Note that the detected abundance of a species in a metagenetic sample may not correlate  
43 with its actual abundance in the broader area, making drawing boundaries between local communities using any  
44 computational approach difficult. As a result, prior work in community analysis has often relied on additional

45 metadata such as physical barriers and environmental measurements to refine the structure of estimated local  
46 communities based on the species observed (Holyoak et al. 2005).

47 Here, we consider novel, data-driven (unsupervised) approaches for defining communities based on clusters,  
48 or different inter-related groups, inferred only from NGS sequence data. These approaches allow us to artificially  
49 induce computational cutoffs and, as a result, no prior knowledge/metadata are required to infer potential  
50 relationships between samples. Because environmental characteristics can change the viability of a microbial  
51 species occupying that area (Hultman et al. 2015);(Gibbons & Gilbert 2015), subsequent comparisons of  
52 groupings to independent environmental variables provides a biologically motivated assessment of whether these  
53 computationally generated results uncover local communities. To define clusters we introduce MinHash (Ondov  
54 et al. 2016) based similarity for determining local community structure, which essentially an approximation of  
55 the Jaccard similarity based on shared species within samples (see Rusch et al. 2007 and Ondov et al. 2016 for  
56 details). We also apply Non-Negative Matrix Factorization (NMF) (Gaujoux & Seoighe, 2010);(Seung & Lee  
57 1999);(Paatero & Tapper 1994) using the nsNMF algorithm (Pascual-Montano et al. 2006) to determine non-  
58 shared species based on OTU abundances. Log likelihood statistical analysis of an Atacama desert microbial  
59 community indicates that among these *de novo* methods, hierarchical clustering using MinHash similarities has  
60 more explicative power than NMF on OTU abundance. This data set is a good choice for this analysis because of  
61 the data's wide geographic range and inclusion of environmental variables. For the analysis of the Atacama  
62 desert, samples taken from the same sampling location (North/Central/South) were more similar according to  
63 alpha diversity (Crits-Christoph et al. 2013); however, we show that other environmental variables can have a  
64 statistically higher correlation than sampling location, and specifically that PH, air relative humidity (RH) and soil  
65 conductivity best explain observed local communities derived computationally. Combined, these indicate data-  
66 driven methods can be directly used to estimate community structure from NGS data.

67 *NMF, MASH, Silhouettes, and ANOVA*

68 Here, NMF (Berman & Plemmons, 1994) and Mash (Ondov et al. 2016) are integral to defining local  
69 community structure. NMF—or Non-Negative Matrix Factorization—is method by which to split a matrix into a  
70 components, based on the factors that are most important in making that split. For example, for RNA-seq  
71 expression analysis, suppose there are ‘k’ known clusters. NMF will break a provided expression matrix (genes  
72 by cells or cell tissues) into  $k$  total clusters while also producing the most important genes for doing so (Yu-Jui,  
73 2016). When applied to observed OTU abundances, NMF will ideally return the most important OTUs to generate  
74 a fixed number of community-driven clusters. The power in this method is that different factors may be indicators  
75 for each cluster, instead of just the presence or absence of a particular expressed gene or observed species. NMF  
76 becomes particularly powerful when paired with k-means (Hartigan & Wong, 1979);(Forgey, 1965), which is a  
77 clustering method that can be used to measure how many clusters exist (aka, the ‘fit’). Because NMF combines  
78 factor discovery with iterative determination of the total number of clusters, NMF can be a more descriptive  
79 alternative to simple PCA-based visualization of the data.

80 Mash, which is based on MinHash sketching (Broder, 1997), is an alignment-free method by which to  
81 estimate the distance between two sequences or sets of sequences. Using this computational method a set of  
82 samples can be sequenced and then quickly compared to estimate how similar they are. The resulting pairwise  
83 similarity matrix can then be clustered hierarchically, which can be visualized in the form of dendrograms and/or  
84 heatmaps. Mash can be run on raw samples if desired at the cost of potentially higher inferred distances. Example  
85 hierarchical clustering algorithms are Diana (Struyf et al. 1997);(Kaufman & Rousseeuw, 2009) and McQuitty-  
86 WPGMA (McQuitty, 1966).

87 Using silhouettes (Rousseeuw, 1987);(Handl et al. 2005) and the clustering information derived from NMF  
88 we can further describe structure within a cluster. Specifically, silhouette width highlights the ‘belongingness’ of  
89 each data point within a cluster; higher averages indicate cluster points are more tightly correlated with each  
90 other.

91 Finally we hypothesize that the local assortment of species is largely determined by the environment in which  
92 they live. If so, a change in environment and a corresponding change in observed species should, for the most  
93 part, correlate and this correspondence can be tested using both Anova and a mantel test under the right conditions  
94 (DeLong, 2013). We also realize that environment itself can correlate with distance, i.e., in the northern  
95 hemisphere, northern samples have fewer growing degree days than southern samples. For this reason isolation by  
96 distance (IBD) could also manifest as distinct clusters using our computational alternatives just as they would in a  
97 traditional PCA analysis.

## 98 *Results from Atacama Data*

99 Sample clustering based on OTUs was performed using Non-negative matrix factorization (NMF), which  
100 determines OTUs that are most informative using linear algebra-based techniques (Ondov et al. 2016);(Seung &  
101 Lee 1999);(Paatero & Tapper 1994);(Yu-Jui, 2016). Sample to sample distances were determined based on  
102 minhash sketches, which estimate the Jaccard similarity of two samples based on shared subsequences (k-mers).  
103 We also determined the OTUs present in these Atacama samples using mothur (see Methods). Given our focus  
104 on unsupervised analysis, we processed the mash-based sample distances with multiple clustering methods: K-  
105 means (Hartigan & Wong, 1979);(Forgey, 1965), hierarchical (Everitt, 1974);(Hartigan, 1975): Agglomerative  
106 and Divisive (Kaufman & Rousseeuw, 2009).

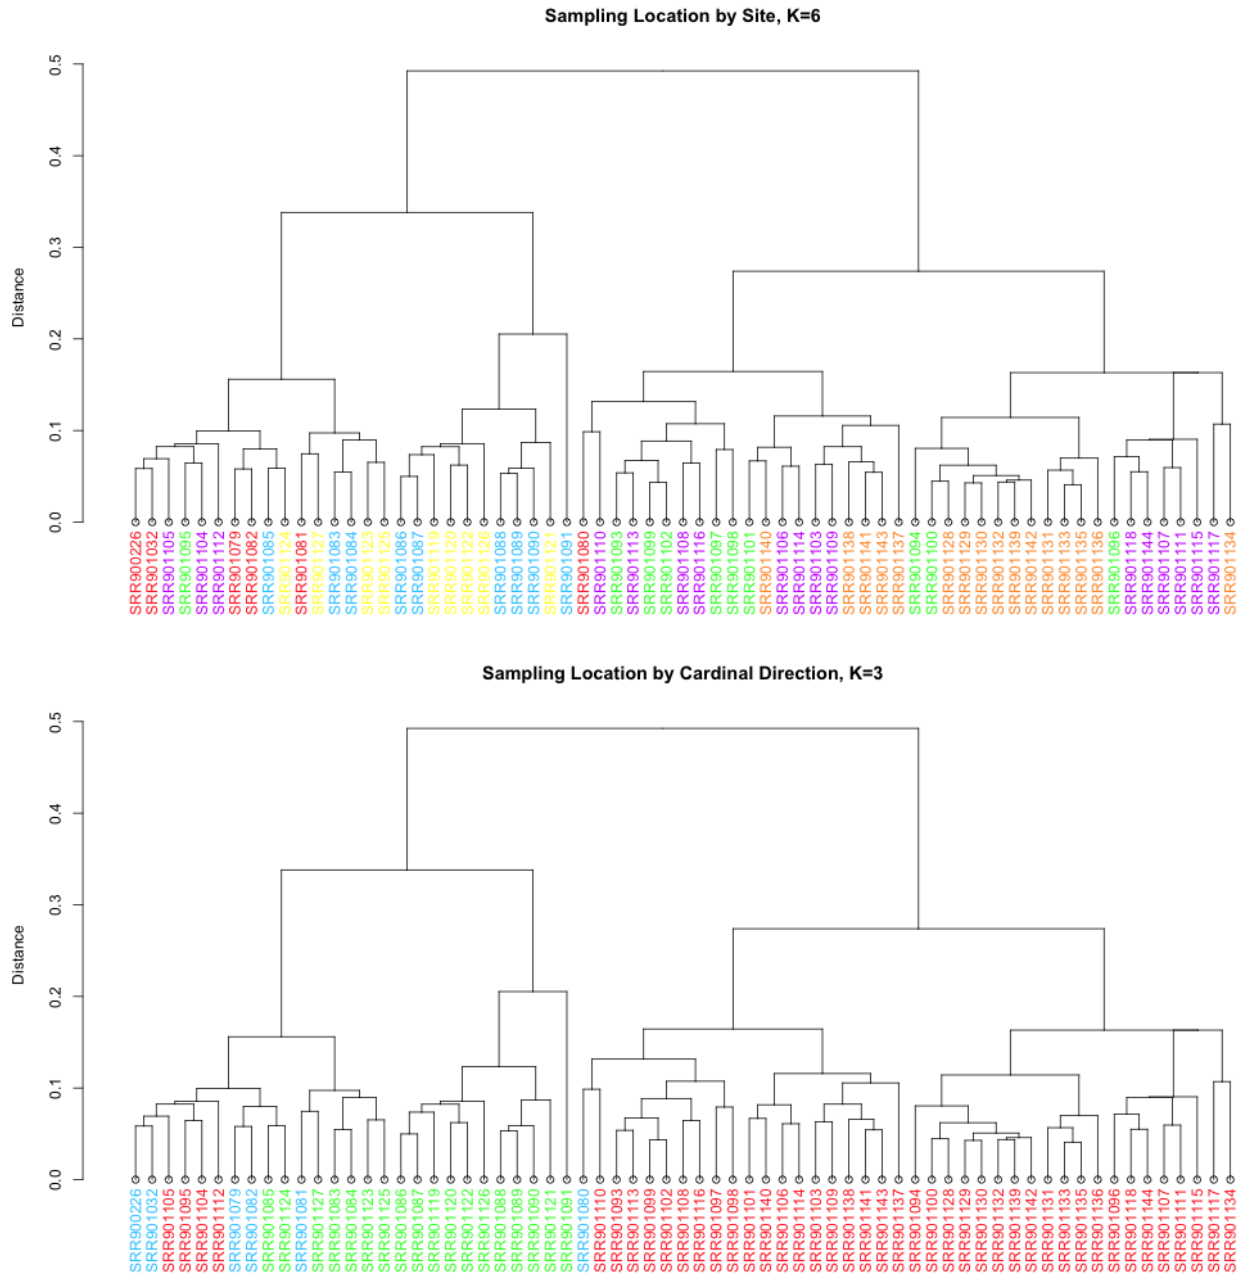

107

108 *Figure 1. Sample clusterings of Crits-Christoph et al. (2013) data using two measures of distance: site*  
109 *location (top) and cardinal direction (bottom). Dendrograms were generated with Diana and are colored by*  
110 *sampling location (top, 6 total).*

111

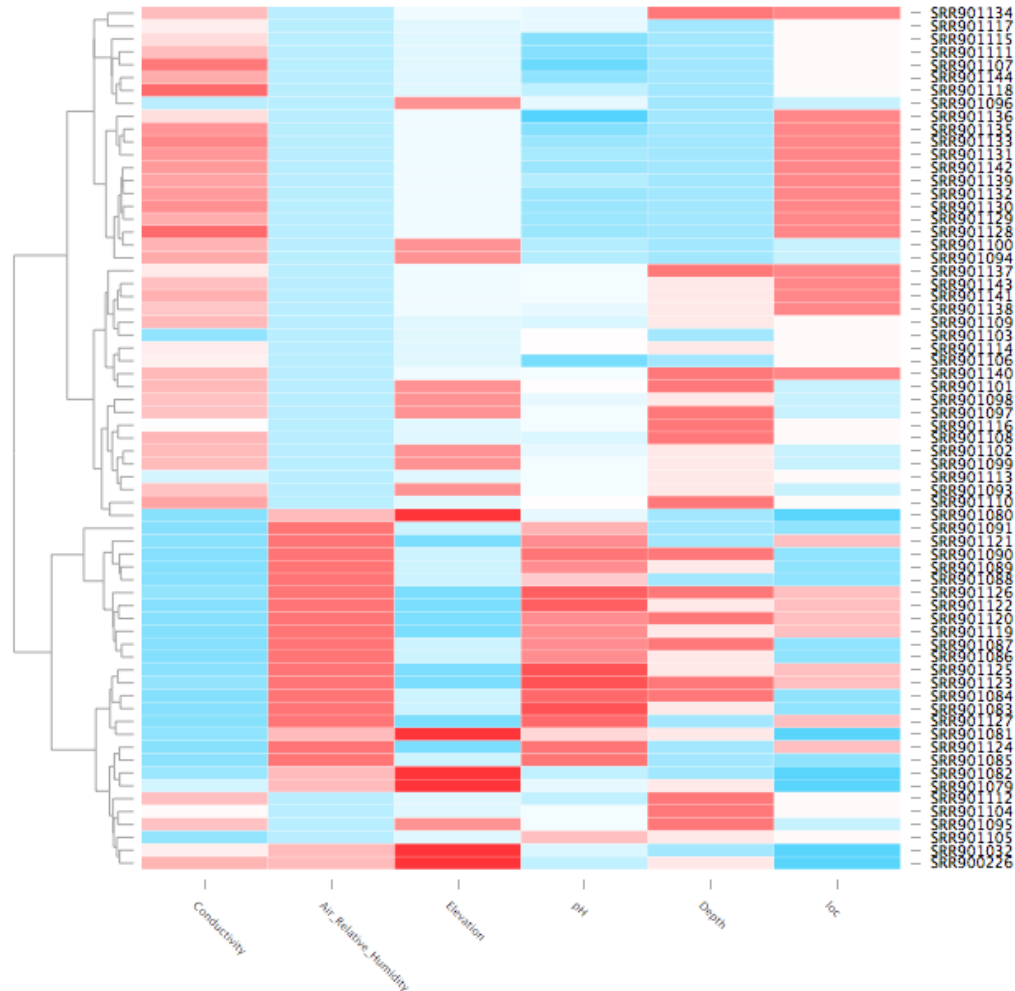

112

113 *Figure 2. Heatmap of Various Environmental Variables, red indicating low and blue indicating high values.*

114 *The left hand side is determined by Diana clustering on sample to sample similarities, as in Figure 1.*

115 Although prior work had shown that alpha diversity relationships among Atacama desert samples were driven  
116 by geographic location (Crits-Christoph et al. 2013), our preliminary analysis suggested sample to sample  
117 similarities based on mash and NMF were better explained by pH, Relative Air Humidity, and Conductivity as  
118 well as the previously reported location variable. Note that this “cluster first” computationally focused approach is  
119 a departure from previous techniques that draw local communities using external metadata to overcome species  
120 dispersion, although the species’ relationships are often defined by interrelated sequence clusters (OTUs).

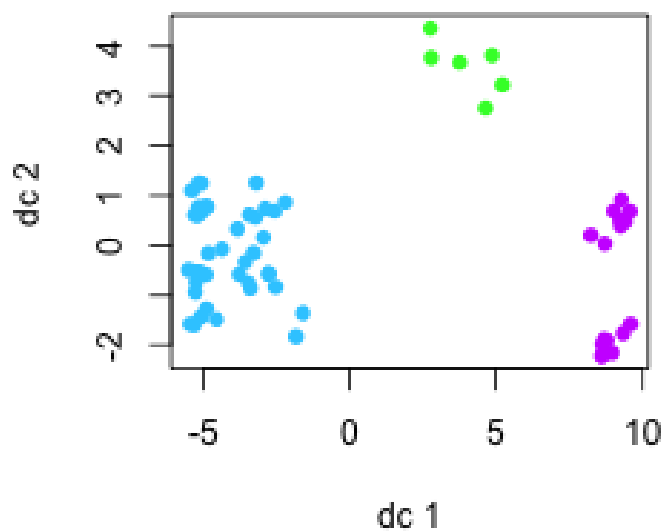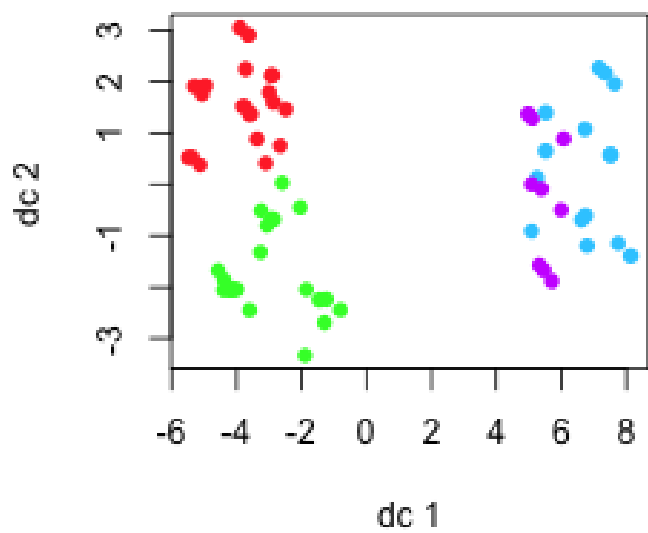

121

122 *Figure 3. PCA of environmental variables at (top) K=3, and (bottom) K=4, colored according to assigned*  
123 *cluster as determined by K-means (Hartigan & Wong, M 1979).*



124 To be consistent with current practice, we first applied Principal Component Analysis (PCA) using the  
125 samples' environmental variables (Air Humidity, Depth, Elevation, Soil Conductivity, and PH) to assess whether  
126 there is a ecological basis for observed clusters (Figure 2). We also used Average Silhouette Width (Rousseeuw,  
127 1987), which provides a measure of how dense clusters are, with denser clusters being preferred. Average  
128 Silhouette can be used to determine the number of clusters by picking the higher average, in the case of  
129 comparing two candidate clusterings.

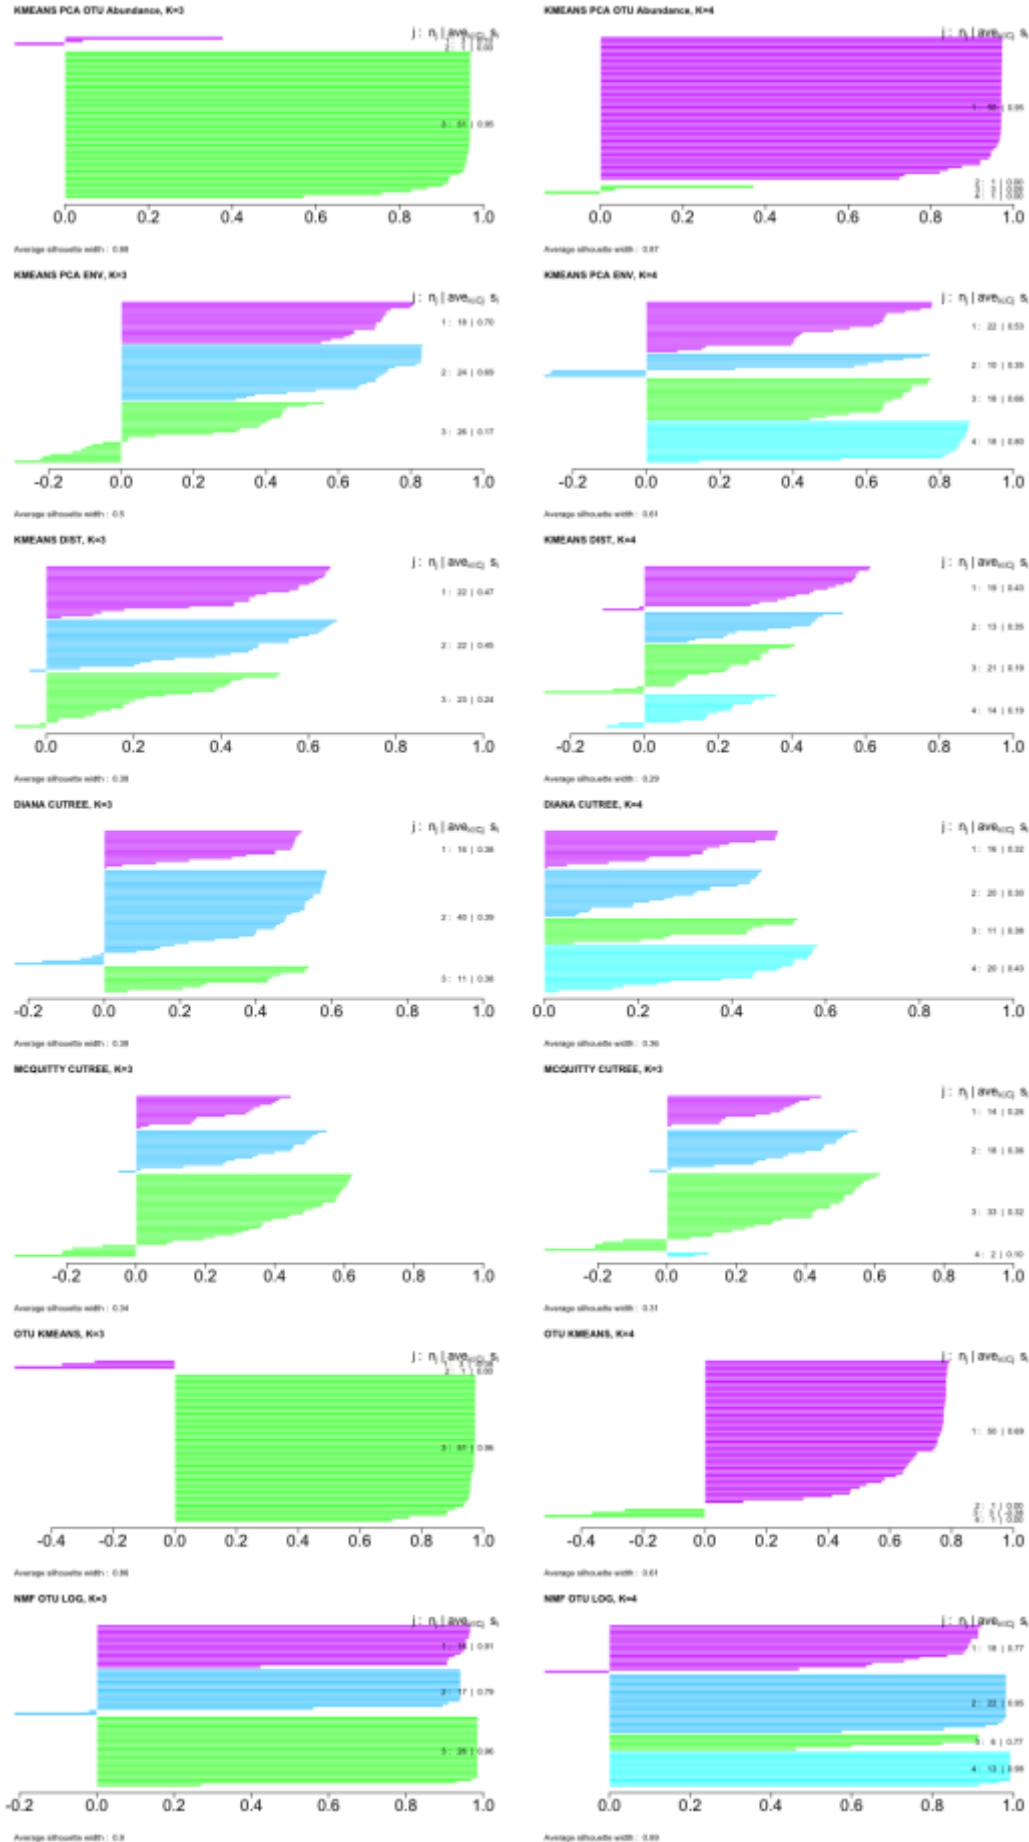

131 *Figure 4. Left Side, red, k=3, right side, orange, k=4, Top to Bottom: PCA determined clusters on OTU*  
132 *abundance, PCA determined environmental clusters, kmeans on mash distances, diana on mash distances,*  
133 *kmeans on OTU data (euclidean distance), NMF on OTU data, K=3 and k=4 were found to be viable, on the*  
134 *determination that an Average Silhouette Width above .5 was acceptable, while a score above .25 may indicate*  
135 *structure (Rousseeuw, 1987). The environmentally driven PCA produced viable clusters at both K=3, and K=4,*  
136 *Kmeans on sequence similarity at K=3 weakly indicated structure, Diana clustering weakly indicated structure at*  
137 *K=3 and K=4, and NMF on OTUs produced structured clusters at both K=3 and K=4. All cluster silhouettes*  
138 *show that clustering at 3 or 4 maybe viable, with the exception of K-means on OTUs themselves, in which most*  
139 *samples clustered into a single, large group.*

140 Because silhouette average width for different clustering methods fell at the best values at either K=4, or at  
141 K=3, new clusters were generated at both. At K=3, clusterings were generated by Random Assignment, Non-  
142 negative Matrix Factorization based on abundance information, as well as log transformed OTU abundance, the  
143 three clusters with least within cluster distances from both the Diana, and from Mcquitty-WPGMA hierarchical  
144 clustering. Clusters were also made from Sample PH and from a North, South, or Central location. Since  
145 environmental variable mixing was previously reported to be the driver of beta diversity at k=3 (cite Atacama  
146 paper), we used environmental variable mixing to also generate clusterings. K=4 clusterings were generated with  
147 Random Assignment, Non-negative Matrix Factorization based on abundance information, as well as log  
148 transformed abundance information, the four clusters with least within cluster distances from both the Diana, and  
149 from Mcquitty-WPGMA hierarchical clustering, as well as from PH. Cluster to Cluster correlations show that  
150 Mcquitty-WPGMA is more similar to environmental clusterings; however, all non-random clusterings are more  
151 similar to each other than to randomly generated clusterings, indicating all detect some elements of community  
152 structure present in the data. Although this analysis has indicated that there was an ecological correlation to  
153 computationally derived clusters, it has not shown which factors, or how those factors affect clustering. Further,  
154 skewed species abundances with a few dominant species could make it more difficult to sample rare species at  
155 modest sequencing depth; however, because Mash estimates the similarity between two sets, slight stochastic

156 differences in observed abundances should not significantly affect the results relative to traditional OTU  
157 approaches that are also subject to sequence depth to uncover OTUs.

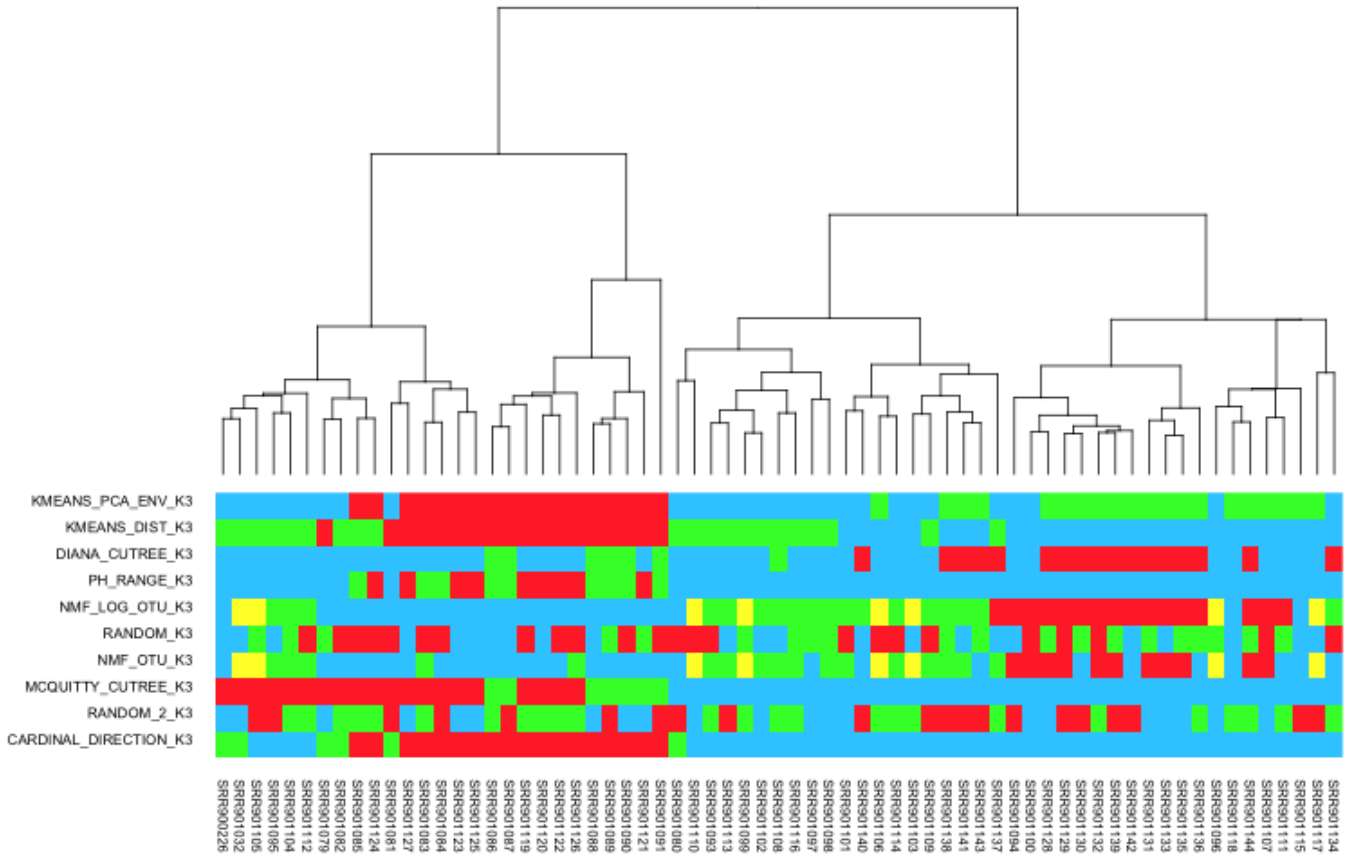

158

159

160 *Figure 5. K=3 groupings ordered by a Diana determined dendrogram, yellow means that value was not*  
161 *found. It's more important that samples between belong to the same group than to the same color. Each row*  
162 *represents a grouping with three total groups. If between two grouping a sample has the same color with another*  
163 *sample that means that those two groupings put that sample in the same group. For instance, in K-means on PCA*  
164 *of environmental variables there is a large red section, and NMF on log OTU many of those samples that were*

165 *marked red are now marked blue, that is an indication that these two methods have grouped these samples into*  
166 *their own clusters.*

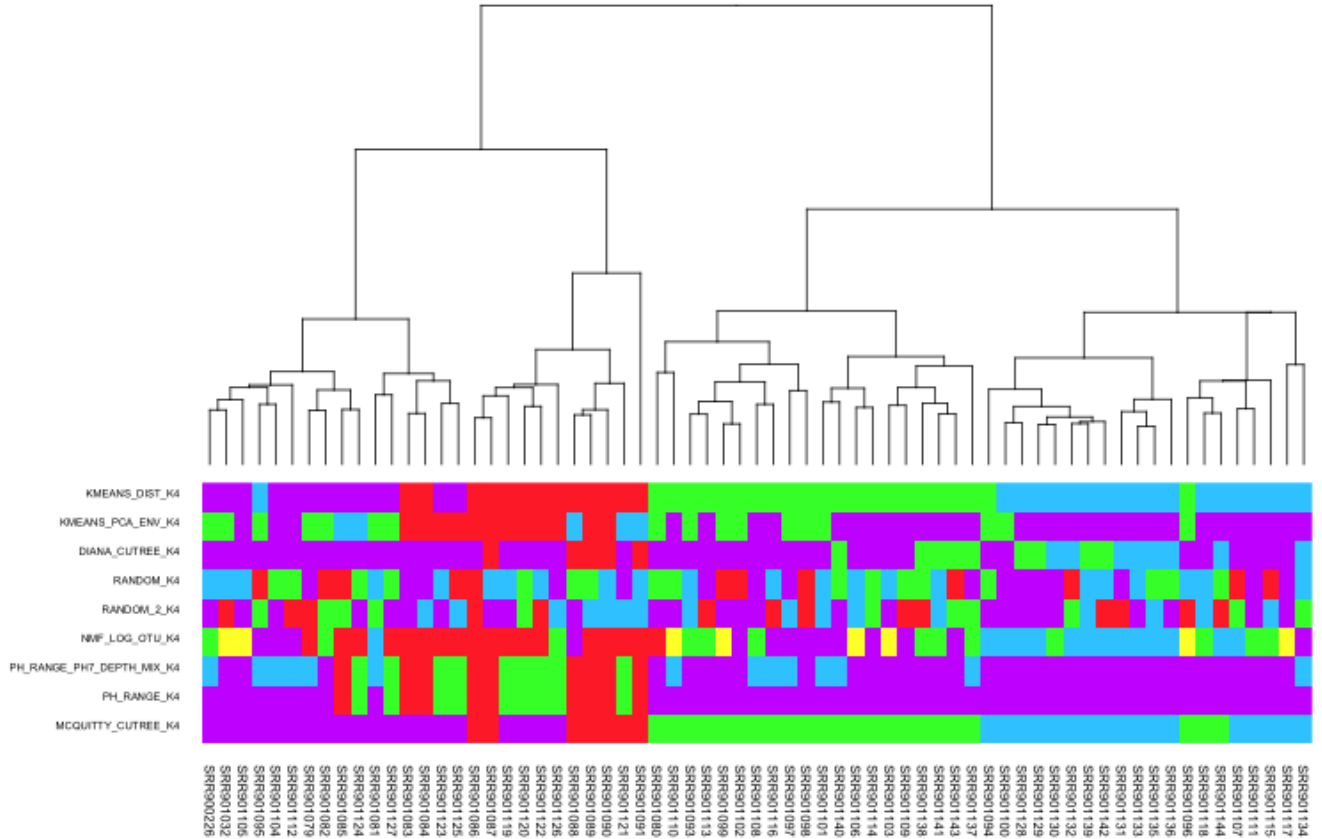

167

168 *Figure 6. K=4 groupings ordered by a Diana determined dendrogram, yellow means that value was not*  
169 *found. It's more important that samples between belong to the same group than to the same color. Each row*  
170 *represents a grouping with three total groups. If between two grouping a sample has the same color with another*  
171 *sample that means that those two groupings put that sample in the same group.*

172

173

174

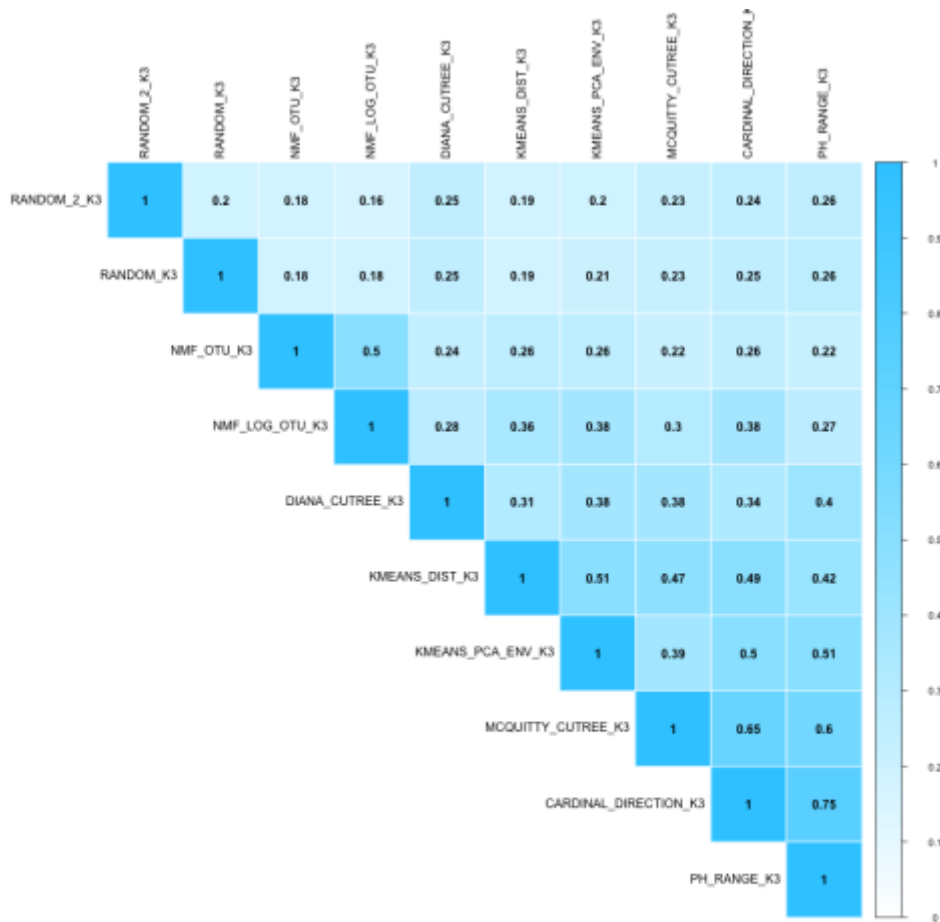

175 *Figure 7. represents cluster similarities between each cluster, cluster similarity jaccard algorithm was used,*

176 *k=3 clusterings are shown.*

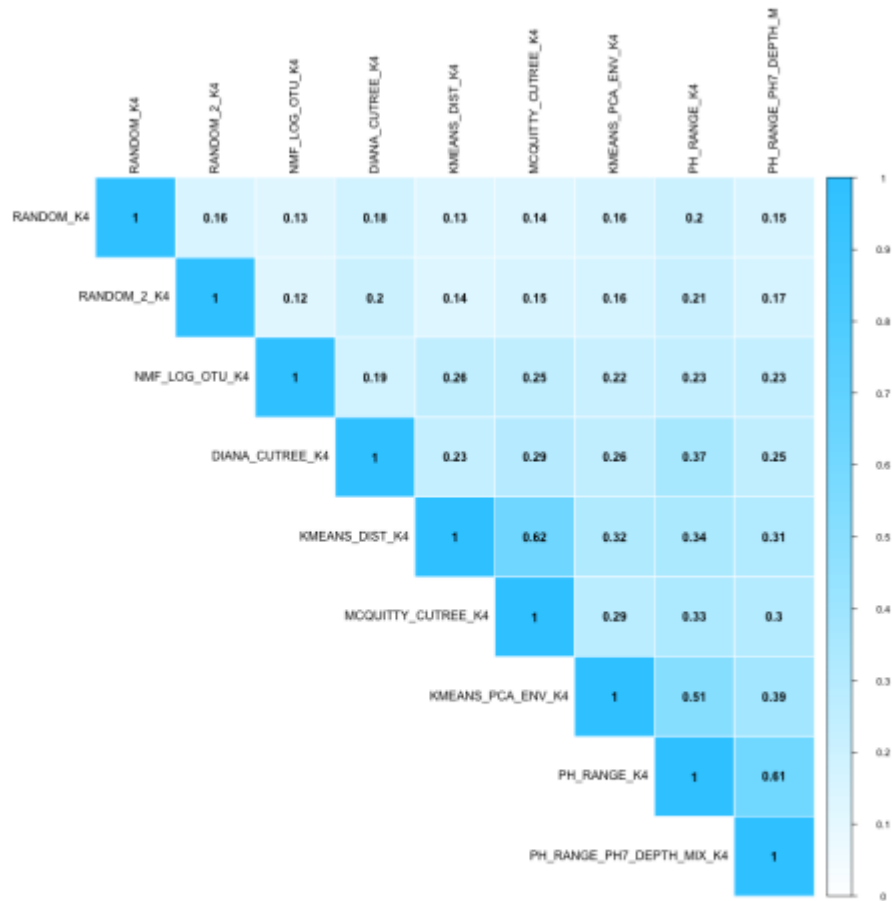

177

178 *Figure 8. represents cluster similarities between each cluster, cluster similarity jaccard algorithm was used,*

179 *k=4 clusterings are shown.*

180

| ANOVA Results         | MCQUITTU_CUTREE_K3 |         | NMF_LOG_OTU_K3 |         | MCQUITTU_CUTREE_K4 |         | NMF_LOG_OTU_K4 |         |
|-----------------------|--------------------|---------|----------------|---------|--------------------|---------|----------------|---------|
|                       | P-value            | Signif. | P-value        | Signif. | P-value            | Signif. | P-value        | Signif. |
| pH                    | 6.97E-13           | ***     | 1.13E-12       | ***     | 3.99E-14           | ***     | 2.41E-07       | ***     |
| Elevation             | 0.14448            |         | 0.015637       | *       | 0.000823           | ***     | 0.02558        | *       |
| Conductivity          | 0.00573            | **      | 7.32E-05       | ***     | 0.398154           |         | 0.02377        | *       |
| Air_Relative_Humidity | 5.03E-07           | ***     | 0.000361       | ***     | 0.006096           | **      | 0.01114        | *       |

|                                                                                                                           |         |    |          |   |          |    |         |    |
|---------------------------------------------------------------------------------------------------------------------------|---------|----|----------|---|----------|----|---------|----|
| Depth                                                                                                                     | 0.08345 |    | 0.310562 |   | 0.004934 | ** | 0.02009 | *  |
| pH with Conductivity                                                                                                      | 0.81559 |    | 0.026234 | * | 0.005361 | ** | 0.00579 | ** |
| Elevation with Conductivity                                                                                               | 0.50011 |    | 0.784539 |   | 0.14726  |    | 0.01553 | *  |
| Elevation with Air_Relative_Humidity                                                                                      | 0.01035 | *  | 0.375278 |   | 0.029011 | *  | 0.69145 |    |
| Conductivity with Air_Relative_Humidity                                                                                   | 0.00156 | ** | 0.927365 |   | 0.022087 | *  | 0.04518 | *  |
| pH and Depth                                                                                                              | 0.1124  |    | 0.99117  |   | 0.039508 | *  | 0.01784 | *  |
| Conductivity with Air_Relative_Humidity with Depth                                                                        | 0.03048 | *  | 0.371664 |   | 0.133212 |    | 0.91445 |    |
| pH with Elevation with Conductivity with Depth                                                                            | 0.22824 |    | 0.425284 |   | 0.777819 |    | 0.03665 | *  |
| Signif. codes: 0 '***' 0.001 '**' 0.01 '*' 0.05 '.' 0.1 ' ' 1                                                             |         |    |          |   |          |    |         |    |
| 8 observations deleted due to missingness in NMF Analyses, 1 observations deleted due to missingness in Mcquitty Analyses |         |    |          |   |          |    |         |    |

181

182 The clusterings were modeled by ANOVA, and after calculating a log likelihood test, we found that for both  
183 K=3 and K=4 Mcquitty hierarchical clustering, followed by NMF on OTUs, were the most significant and  
184 therefore best corresponded to the environmental data. For McQuitty hierarchal clustering, PH and Elevation were  
185 found to have the most significance, however, since the elevation was the same for all of the samples of any given  
186 sampling site, since elevation is highly correlated with sampling location there maybe some other variable that is  
187 being indirectly measured, also highly correlated with sampling location. For NMF on log abundance PH ,  
188 Conductivity, and Relative humidity of the air were found to be most significant; however, because relative  
189 humidity of each sampling site was the same, it is unknown whether relative humidity of the air was the  
190 contributing factor or some other, unknown variable, that also differed from site to site was a factor.

191

192 McQuitty clustering has a .65 similarity with the Cardinal Direction, and similarly High similarities with  
193 other environmentally determined groupings. We also see that both McQuitty and NMF have high p-values with  
194 some environmental variables in anova, with Ph being particularly significant in both McQuitty and NMF, and to



195 a lesser extent Relative Air Humidity being significant as well, and that the sample similarities within these  
196 groupings are high. This shows that OTU based methods and distance based methods produce similar results, if  
197 driven by slightly different environmental variables, and is getting at the underlying structure of the local  
198 communities.

199

200 As per the clustering silhouettes, some of the methods, Diana and NMF, work better at four clusters, while  
201 McQuitty and K-means did better at three. The most explicative results, as per ANOVA, NMF on log OTU  
202 abundance and McQuitty slightly disagree on which environmental variables have the most importance, but PH  
203 and Relative Air Humidity can be seen across all four ANOVAs.

204 *Concluding Remarks and Recommendations*

205

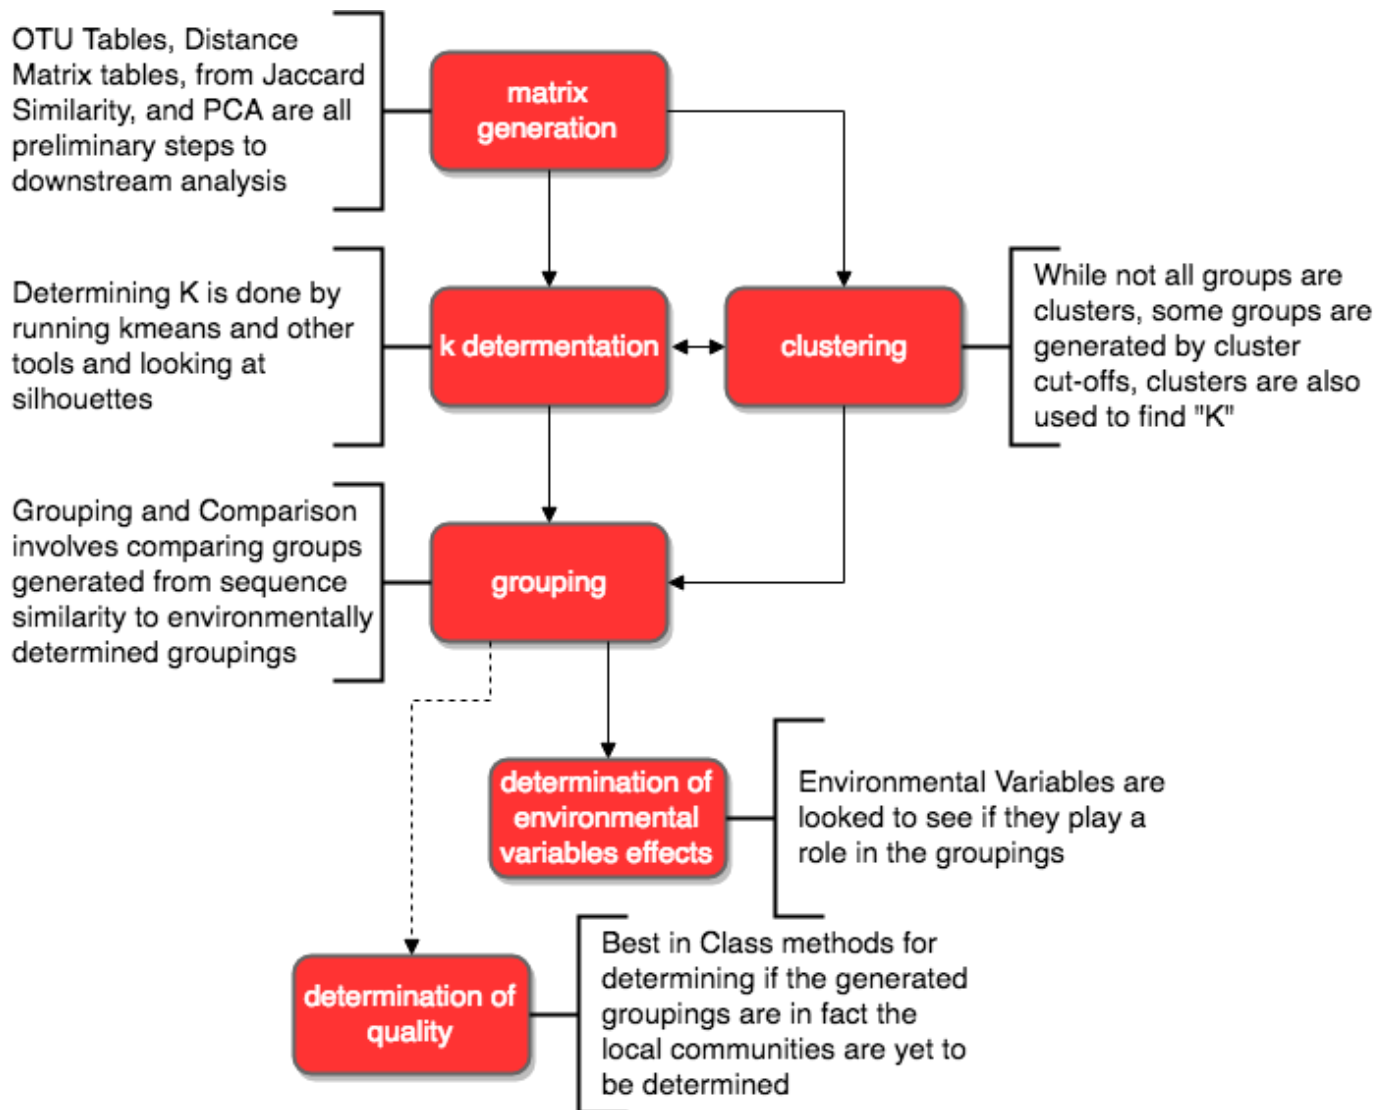

206 Figure 9. Workflow for Determining, Describing, and Validating Atacama data.

207

208

209 As a general workflow (figure 9), after sample collection either OTUs abundances are generated, or sample to  
210 sample distances are calculated by comparing their contained trimmed sequences. In the case of the sample to  
211 sample distances a distance matrix is generated that can be clustered though hierarchical or other means, and in  
212 the case of OTU abundances NMF or K-means is better suited. We calculated pairwise distance on both shared

213 sequences and on OTUs, and then clustered OTUs and shared sequences via K-means, and for shared sequences  
214 diana clustering was also utilized, and for NMF was also utilized for OTU abundance. The groupings can then be  
215 checked for the influence of independent variables, through a statistical model, in this case anova, which was run  
216 on clusters, the 'anova' function from the R 'stats' package was used, and LogLik from the R 'stats' package was  
217 used to compare Log-Likelihoods. Clusters were compared to each other using both RAND and Jaccard similarity  
218 cluster evaluation methods, as well as a wilcox test (Hollander et al. 2013);(Bauer, 1972).

219 The Atacama data used here is from SRA:SRA091062, Bioproject ID: PRJNA208226, which was thought of  
220 as three clusters of data, aligning with sampling site: North, Central, and South. Atacama was chosen for its  
221 previous environmental analysis, geographically distinct sampling sites, and curated metadata.

222 Mothur was used to process Raw files for OTU analysis as per non-shhh (Quince et al. 2009) 454 SOP:  
223 [https://www.mothur.org/wiki/454\\_SOP](https://www.mothur.org/wiki/454_SOP). for sequence similarity distance Mothur was used to filter samples  
224 based quality scores, as per the shhh and trimming portion of the mothur 454 SOP. Initial NMF analysis (figure  
225 10) was done with “sake” ( <https://github.com/naikai/sake> ), which was originally created to analyze gene  
226 expression data, was here utilized to look at OTU abundance data, at k=3 both log transformed and non-log  
227 transformed data was utilized, the nsNMF NMF algorithm NMF algorithm was used and the the NMF tool was  
228 run at 350 runs, at k=4 only log transformed data was run, with the nsNMF (Pascual-Montano et al. 2006) , NMF  
229 algorithm at 350 runs. nsNMF was chosen for its design to deal with perceived sparseness in the data. The R  
230 'cluster\_similarity' function from the 'clusteval' package was used for Jaccard and RAND similarities, while  
231 'wilcox.test' function from the R 'stats' package was used for the wilcox test. wpgma was chosen for  
232 Agglomerative clustering because clusters were expected to be of unequal size, as unweighted hierarchical  
233 methods can become distorted when large and small groups are compared, and a clear contrast to centroid  
234 clustering, as like k-means, was desired. The R 'hclust' function was used from the 'stats' package was used for  
235 agglomerative clustering. Diana, from the R 'cluster' package was used for divisive hierarchical clustering, in  
236 agglomerative hierarchical clustering samples are combined until all samples are in the same cluster, whereas in  
237 divisive hierarchical clustering all samples start in the same cluster and then are partitioned into daughter

238 clusters.. And further analysis and figure analysis was done with the caret ( [https://cran.r-](https://cran.r-project.org/package=caret)  
239 [project.org/package=caret](https://cran.r-project.org/package=caret) ), clusteval ( <https://cran.r-project.org/package=clusteval> ), cluster ( [https://CRAN.R-](https://CRAN.R-project.org/package=cluster)  
240 [project.org/package=cluster](https://CRAN.R-project.org/package=cluster) ), corrplot ( <https://CRAN.R-project.org/package=corrplot> ), d3heatmap ( <https://CRAN.R-project.org/package=d3heatmap> ), fpc ( <https://CRAN.R-project.org/package=fpc> ), gplots ( <https://CRAN.R-project.org/package=gplots> ), and NMF ( <https://CRAN.R-project.org/package=NMF> ) R  
241  
242  
243 packages.

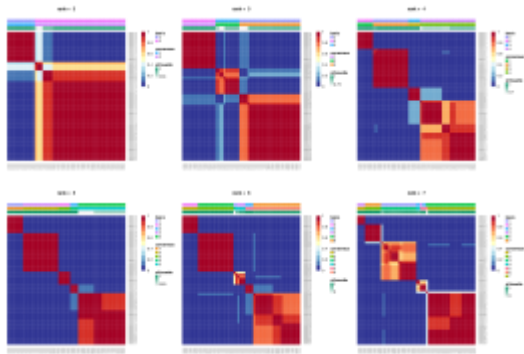

244

245 Figure 10. Correlations of various number of clusters (k) based on K-Means from k=2 to k=7.

## 246 *References*

247

248 Holyoak, M., Leibold, M.A., Holt, R.D. (2005). *Metacommunities : spatial dynamics and ecological*  
249 *communities*. University of Chicago Press.

250 Parsons, K.J., Cooper, W.J., Albertson, R.C., Lundrigan, B. & Jr, G. (2009). Limits of Principal Components  
251 Analysis for Producing a Common Trait Space: Implications for Inferring Selection, Contingency, and  
252 Chance in Evolution (I. Dworkin, Ed.). *PLoS ONE*, **4**, e7957.

- 253 Jolliffe, I.T. (1986). Principal Component Analysis and Factor Analysis. pp. 115–128. Springer, New York,  
254 NY.
- 255 Ondov, B.D., Treangen, T.J., Melsted, P., Mallonee, A.B., Bergman, N.H., Koren, S. & Phillippy, A.M.  
256 (2016). Mash: fast genome and metagenome distance estimation using MinHash. *Genome Biology*, **17**,  
257 132.
- 258 Rusch, D.B., Halpern, A.L., Sutton, G., Heidelberg, K.B., Williamson, S., Yooseph, S., Wu, D., Eisen, J.A.,  
259 Hoffman, J.M., Remington, K., Beeson, K., Tran, B., Smith, H., Baden-Tillson, H., Stewart, C.,  
260 Thorpe, J., Freeman, J., Andrews-Pfannkoch, C., Venter, J.E., Li, K., Kravitz, S., Heidelberg, J.F.,  
261 Utterback, T., Rogers, Y.-H., Falcón, L.I., Souza, V., Bonilla-Rosso, G., Eguiarte, L.E., Karl, D.M.,  
262 Sathyendranath, S., Platt, T., Bermingham, E., Gallardo, V., Tamayo-Castillo, G., Ferrari, M.R.,  
263 Strausberg, R.L., Neelson, K., Friedman, R., Frazier, M. & Venter, J.C. (2007). The Sorcerer II Global  
264 Ocean Sampling Expedition: Northwest Atlantic through Eastern Tropical Pacific (N.A. Moran, Ed.).  
265 *PLoS Biology*, **5**, e77.
- 266 Seshadri, R., Kravitz, S.A., Smarr, L., Gilna, P. & Frazier, M. (2007). CAMERA: A Community Resource  
267 for Metagenomics. *PLoS Biology*, **5**, e75.
- 268 Hultman, J., Waldrop, M.P., Mackelprang, R., David, M.M., McFarland, J., Blazewicz, S.J., Harden, J.,  
269 Turetsky, M.R., McGuire, A.D., Shah, M.B., VerBerkmoes, N.C., Lee, L.H., Mavrommatis, K. &  
270 Jansson, J.K. (2015). Multi-omics of permafrost, active layer and thermokarst bog soil microbiomes.  
271 *Nature*, **521**, 208–212.
- 272 Gibbons, S.M. & Gilbert, J.A. (2015). Microbial diversity--exploration of natural ecosystems and  
273 microbiomes. *Current opinion in genetics & development*, **35**, 66–72.
- 274 Gaujoux, R. & Seoighe, C. (2010). A flexible R package for nonnegative matrix factorization. *BMC*  
275 *Bioinformatics*, **11**, 367.

- 276 Seung, H.S. & Lee, D.D. (1999). Learning the parts of objects by non-negative matrix factorization. *Nature*,  
277 **401**, 788–791.
- 278 Paatero, P. & Tapper, U. (1994). Positive matrix factorization: A non-negative factor model with optimal  
279 utilization of error estimates of data values. *Environmetrics*, **5**, 111–126.
- 280 Pascual-Montano, A., Carazo, J.M., Kochi, K., Lehmann, D. & Pascual-Marqui, R.D. (2006). Nonsmooth  
281 nonnegative matrix factorization (nsNMF). *IEEE Transactions on Pattern Analysis and Machine*  
282 *Intelligence*, **28**, 403–415.
- 283 Crits-Christoph, A., Robinson, C.K., Barnum, T., Fricke, W., Davila, A.F., Jedynak, B., McKay, C.P. &  
284 DiRuggiero, J. (2013). Colonization patterns of soil microbial communities in the Atacama Desert.  
285 *Microbiome*, **1**, 28.
- 286 Berman, A. & Plemmons, R. (1994). *Nonnegative matrices in the mathematical sciences*.
- 287 Ho, Yu-Jui. (2016). Single-cell RNA-Seq Analysis and Klustering Evaluation. URL  
288 <https://github.com/naikai/sake> [accessed 24 April 2017]
- 289 Hartigan, J. & Wong, M. (1979). Algorithm AS 136: A k-means clustering algorithm. *Statistical Society*.  
290 *Series C (Applied Statistics)*.
- 291 Forgey, E. (1965). Cluster analysis of multivariate data: Efficiency vs. interpretability of classification.  
292 *Biometrics*.
- 293 Broder, A. (1997). On the resemblance and containment of documents. *Compression and Complexity of*  
294 *Sequences 1997*.
- 295 Struyf, A., Hubert, M. & Rousseeuw, P. (1997). Integrating robust clustering techniques in S-PLUS.  
296 *Computational Statistics & Data*.

- 297 Kaufman, L. & Rousseeuw, P. (2009). *Finding groups in data: an introduction to cluster analysis*.
- 298 McQuitty, L.L. (1966). Similarity Analysis by Reciprocal Pairs for Discrete and Continuous Data.
- 299 *Educational and Psychological Measurement*, **26**, 825–831.
- 300 Rousseeuw, P.J. (1987). Silhouettes: A graphical aid to the interpretation and validation of cluster analysis.
- 301 *Journal of Computational and Applied Mathematics*, **20**, 53–65.
- 302 Handl, J., Knowles, J. & Kell, D.B. (2005). Computational cluster validation in post-genomic data analysis.
- 303 *Bioinformatics*, **21**, 3201–3212.
- 304 DeLong, E.F. (2013). *Microbial metagenomics, metatranscriptomics, and metaproteomics*.
- 305 Everitt, B. (1974). Cluster analysis: An SSRC review of recent research.
- 306 Hartigan, J. (1975). Clustering algorithms.
- 307 Hollander, M., Wolfe, D. & Chicken, E. (2013). *Nonparametric statistical methods*.
- 308 Bauer, D. (1972). Constructing confidence sets using rank statistics. *Journal of the American Statistical*
- 309 *Association*.
- 310 Quince, C., Lanzén, A., Curtis, T.P., Davenport, R.J., Hall, N., Head, I.M., Read, L.F. & Sloan,
- 311 W.T. (2009). Accurate determination of microbial diversity from 454 pyrosequencing data.
- 312 *Nature Methods*, **6**, 639–641.
- 313
